# Supplementary material
Source: Springer Nature journal article supplement (https://www.springermedizin.de/resource/supplementary/12913_2010_1376_MOESM1_ESM.pdf/9528008)
Supplement: MOESM1 [file 9528008]

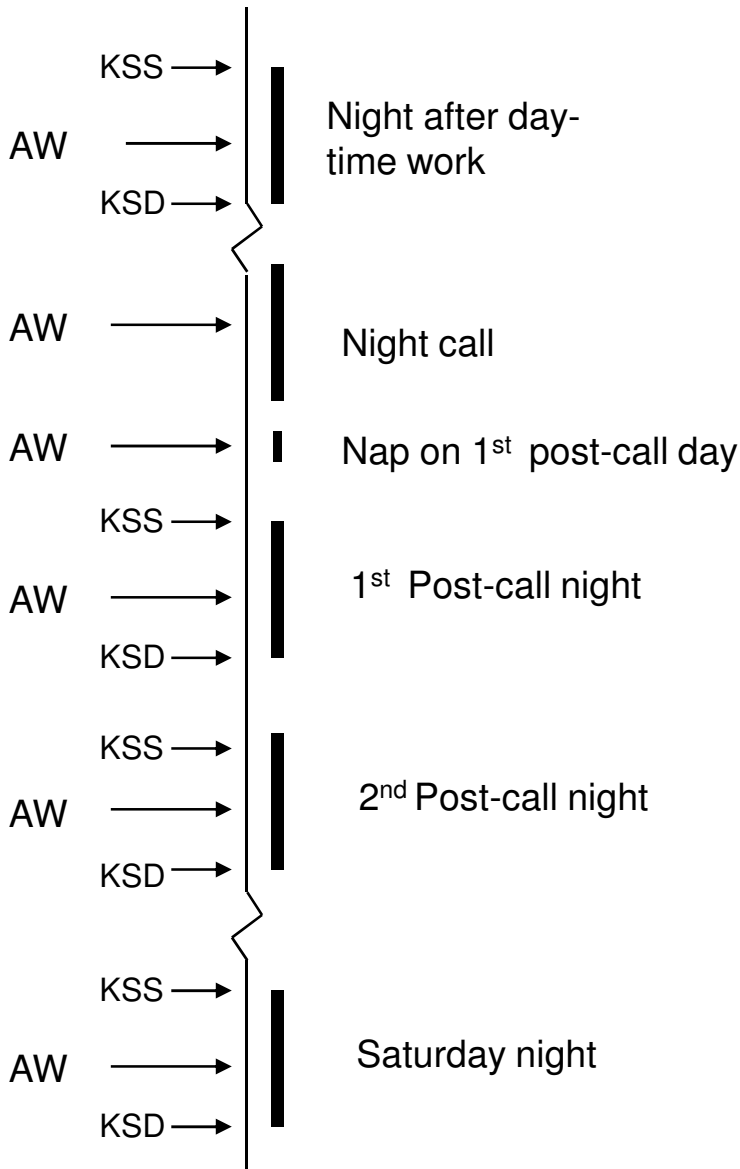

AW = Actiwatch  
(black lines indicate  
sleep analysis  
period)

KSS = Karolinska  
Sleepiness Scale

KSD = Karolinska  
Sleep Diary
